# Supplementary material for: Mapping of Research in the Field of Forest Therapy-Related Issues: A Bibliometric Analysis for 2007–2021
Source: PubMed Central journal article supplement (PMC9309728; doi:10.3389/fpsyg.2022.930713), 2022-07-11
Supplement: Data_Sheet_1.pdf [file Data_Sheet_1.pdf]

## Supplementary Material

### 1 Supplementary Figures

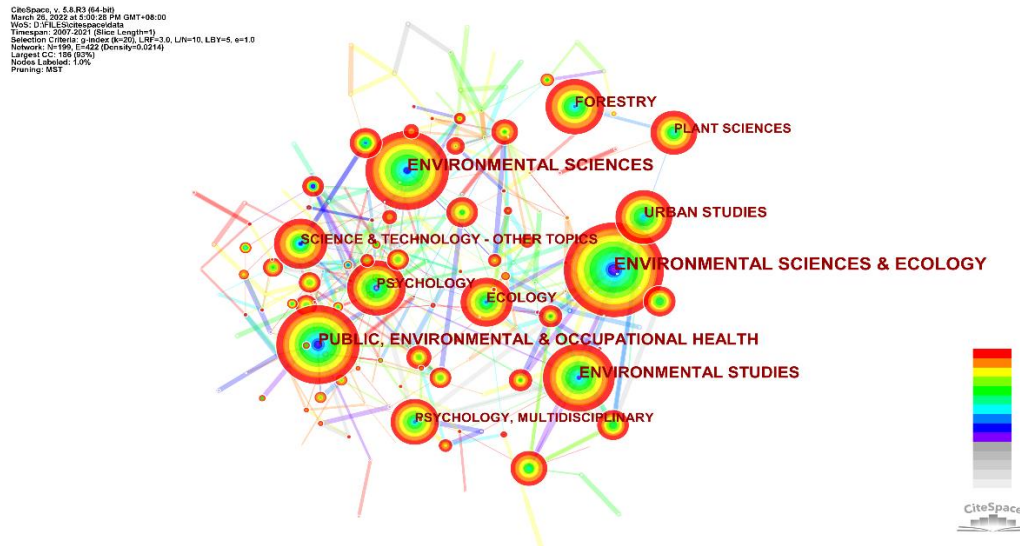

**Fig. S1.** Subject Categories of publications.

### 2 Supplementary Tables

**Table S1.** The top 10 most cited references of Cluster# 0 - 2.

| Clusters | Frequency | Author                   | Year | Title                                                                                                                                                                |
|----------|-----------|--------------------------|------|----------------------------------------------------------------------------------------------------------------------------------------------------------------------|
| 0        | 285       | Sandifer, Paul A. et al. | 2015 | Exploring connections among nature, biodiversity, ecosystem services, and human health and well-being: Opportunities to enhance health and biodiversity conservation |
| 0        | 165       | Hartig T. et al.         | 2014 | Nature and Health                                                                                                                                                    |
| 0        | 107       | McMahan EA. et al.       | 2015 | The effect of contact with natural environments on positive and negative affect: A meta-analysis                                                                     |
| 0        | 92        | Shanahan DF. et al.      | 2016 | Health Benefits from Nature Experiences Depend on Dose                                                                                                               |
| 0        | 72        | Bratman GN. et al.       | 2015 | Nature experience reduces rumination and subgenual prefrontal cortex activation                                                                                      |
| 0        | 72        | Heather Ohly et al.      | 2016 | Attention Restoration Theory: A systematic review of the attention restoration potential of exposure to natural environments                                         |
| 0        | 72        | Gascon M. et al.         | 2015 | Mental Health Benefits of Long-Term Exposure to Residential Green and Blue Spaces: A Systematic Review                                                               |
| 0        | 69        | Bratman GN. et al.       | 2015 | The benefits of nature experience: Improved affect and cognition                                                                                                     |

## Supplementary Material

|   |     |                          |      |                                                                                                                                           |
|---|-----|--------------------------|------|-------------------------------------------------------------------------------------------------------------------------------------------|
| 0 | 67  | Carrus G. et al.         | 2015 | Go greener, feel better? The positive effects of biodiversity on the well-being of individuals visiting, urban and peri-urban green areas |
| 0 | 67  | Kuo M. et al.            | 2015 | How might contact with nature promote human health? Promising mechanisms and a possible central pathway                                   |
| 1 | 115 | Hansen MM. et al.        | 2017 | Shinrin-Yoku (Forest Bathing) and Nature Therapy: A State-of-the-Art Review                                                               |
| 1 | 93  | Song CR. et al.          | 2016 | Physiological Effects of Nature Therapy: A Review of the Research in Japan                                                                |
| 1 | 60  | Ochiai H. et al.         | 2015 | Physiological and Psychological Effects of Forest Therapy on Middle-Aged Males with High-Normal Blood Pressure                            |
| 1 | 59  | Lee J. et al.            | 2014 | Influence of Forest Therapy on Cardiovascular Relaxation in Young Adults                                                                  |
| 1 | 56  | Bielinis E. et al.       | 2018 | The effect of winter forest bathing on psychological relaxation of young Polish adults                                                    |
| 1 | 52  | Ochiai H. et al.         | 2015 | Physiological and Psychological Effects of a Forest Therapy Program on Middle-Aged Females                                                |
| 1 | 52  | Lee I. et al.            | 2017 | Effects of Forest Therapy on Depressive Symptoms among Adults: A Systematic Review                                                        |
| 1 | 51  | Song CR. et al.          | 2015 | Physiological and Psychological Effects of a Walk in Urban Parks in Fall                                                                  |
| 1 | 50  | Yu CP. et al.            | 2017 | Effects of Short Forest Bathing Program on Autonomic Nervous System Activity and Mood States in Middle-Aged and Elderly Individuals       |
| 1 | 46  | Chun MH. et al.          | 2017 | The effects of forest therapy on depression and anxiety in patients with chronic stroke                                                   |
| 2 | 163 | Markevych I. et al.      | 2017 | Exploring pathways linking greenspace to health: Theoretical and methodological guidance                                                  |
| 2 | 138 | Twohig-Bennett C. et al. | 2018 | The health benefits of the great outdoors: A systematic review and meta-analysis of greenspace exposure and health outcomes               |
| 2 | 111 | Frumkin H. et al.        | 2017 | Nature Contact and Human Health: A Research Agenda                                                                                        |
| 2 | 87  | Kondo MC. et al.         | 2018 | Urban Green Space and Its Impact on Human Health                                                                                          |
| 2 | 73  | Gascon M. et al.         | 2016 | Residential green spaces and mortality: A systematic review                                                                               |
| 2 | 72  | Rojas-Rueda D. et al.    | 2019 | Green spaces and mortality: a systematic review and meta-analysis of cohort studies                                                       |
| 2 | 71  | James P. et al.          | 2016 | Exposure to Greenness and Mortality in a Nationwide Prospective Cohort Study of Women                                                     |
| 2 | 68  | James Peter et al.       | 2015 | A Review of the Health Benefits of Greenness                                                                                              |
| 2 | 67  | Van den Bosch M. et al.  | 2017 | Urban natural environments as nature-based solutions for improved public health - A systematic review of reviews                          |
| 2 | 66  | Akpınar A. et al.        | 2016 | Does green space matter? Exploring relationships between green space type and health indicators                                           |

Table S2. The top 10 citing references of Cluster# 0 - 2.

| Cluster | Rank | Coverage | Author                  | Year | Title                                                                                                                                      |
|---------|------|----------|-------------------------|------|--------------------------------------------------------------------------------------------------------------------------------------------|
| 0       | 1    | 47       | Bratman et al.          | 2019 | Nature and mental health: An ecosystem service perspective                                                                                 |
| 0       | 2    | 46       | Frumkin et al.          | 2017 | Nature Contact and Human Health: A Research Agenda                                                                                         |
| 0       | 3    | 43       | Wendelboe-Nelson et al. | 2019 | A Scoping Review Mapping Research on Green Space and Associated Mental Health Benefits                                                     |
| 0       | 4    | 32       | Bratman et al.          | 2021 | The affective benefits of nature exposure                                                                                                  |
| 0       | 5    | 31       | Roberts et al.          | 2019 | The effect of short-term exposure to the natural environment on depressive mood: A systematic review and meta-analysis                     |
| 0       | 6    | 30       | Buckley et al.          | 2017 | Economic Value of Parks via Human Mental Health: An Analytical Framework                                                                   |
| 0       | 7    | 27       | Aerts et al.            | 2018 | Biodiversity and human health: mechanisms and evidence of the positive health effects of diversity in nature and green spaces              |
| 0       | 8    | 27       | Kondo et al.            | 2018 | Urban Green Space and Its Impact on Human Health                                                                                           |
| 0       | 9    | 27       | Jimenez et al.          | 2021 | Associations between Nature Exposure and Health: A Review of the Evidence                                                                  |
| 0       | 10   | 26       | Reeves et al.           | 2021 | A Qualitative Analysis of UK Wetland Visitor Centres as a Health Resource                                                                  |
| 1       | 1    | 41       | Doimo et al.            | 2020 | Forest and Well-being: Bridging Medical and Forest Research for Effective Forest-Based Initiatives                                         |
| 1       | 2    | 33       | Logan et al.            | 2015 | Natural environments, ancestral diets, and microbial ecology: is there a modern “paleo-deficit disorder”? Part I                           |
| 1       | 3    | 30       | Antonelli et al.        | 2021 | Effects of forest bathing (shinrin-yoku) on individual well-being: an umbrella review                                                      |
| 1       | 4    | 27       | Bratman et al.          | 2021 | The affective benefits of nature exposure                                                                                                  |
| 1       | 5    | 25       | Bach Pages et al.       | 2020 | How Should Forests Be Characterized in Regard to Human Health? Evidence from Existing Literature                                           |
| 1       | 6    | 25       | Peterfalvi et al.       | 2021 | Forest Bathing Always Makes Sense: Blood Pressure-Lowering and Immune System-Balancing Effects in Late Spring and Winter in Central Europe |
| 1       | 7    | 23       | Wendelboe-Nelson et al. | 2019 | A Scoping Review Mapping Research on Green Space and Associated Mental Health Benefits                                                     |
| 1       | 8    | 23       | Kanelli et al.          | 2021 | Engaging the Senses: The Association of Urban Green Space with General Health and Well-Being in Urban Residents                            |
| 1       | 9    | 22       | Wilkie et al.           | 2021 | Prevalence and effectiveness of nature-based interventions to impact adult health-related behaviors and outcomes: a scoping review         |
| 1       | 10   | 22       | Rahimi-Ardabili et al.  | 2021 | Green Space and Health in Mainland China: A Systematic Review                                                                              |
| 2       | 1    | 31       | Rigolon et al.          | 2021 | Green Space and Health Equity: A Systematic Review on the Potential of Green Space to Reduce Health Disparities                            |

|   |    |    |                 |      |                                                                                                                                  |
|---|----|----|-----------------|------|----------------------------------------------------------------------------------------------------------------------------------|
| 2 | 2  | 26 | Bratman et al.  | 2019 | Nature and mental health: An ecosystem service perspective                                                                       |
| 2 | 3  | 23 | Bratman et al.  | 2021 | The affective benefits of nature exposure (Bratman et al., 2021b)                                                                |
| 2 | 4  | 22 | Dzhambov et al. | 2020 | Analytical approaches to testing pathways linking greenspace to health: A scoping review of the empirical literature             |
| 2 | 5  | 22 | Reeves et al.   | 2021 | A Qualitative Analysis of UK Wetland Visitor Centres as a Health Resource                                                        |
| 2 | 6  | 21 | Marselle et al. | 2021 | Biodiversity and Health in the Urban Environment                                                                                 |
| 2 | 7  | 21 | Labib et al.    | 2010 | Scale effects in remotely sensed greenspace metrics and how to mitigate them for environmental health exposure assessment        |
| 2 | 8  | 19 | Peng et al.     | 2021 | Association of residential greenness with geriatric depression among the elderly covered by long-term care insurance in Shanghai |
| 2 | 9  | 18 | Liu et al.      | 2021 | Natural outdoor environments and subjective well-being in Guangzhou, China: Comparing different measures of access               |
| 2 | 10 | 18 | Kua et al.      | 2021 | The influence of residential greenness on mortality in the AsiaPacific region: a systematic review and meta-analysis             |

Table S3. The most cited articles in the high contributed countries.

| Countries | N/C | Citations | Year | Title                                                                                                                                                                |
|-----------|-----|-----------|------|----------------------------------------------------------------------------------------------------------------------------------------------------------------------|
| USA       | 1/2 | 682       | 2012 | Contributions of cultural services to the ecosystem services agenda                                                                                                  |
| USA       | 1/2 | 436       | 2015 | Exploring connections among nature, biodiversity, ecosystem services, and human health and well-being: Opportunities to enhance health and biodiversity conservation |
| USA       | 1/2 | 420       | 2012 | The impacts of nature experience on human cognitive function and mental health                                                                                       |
| USA       | 1/2 | 356       | 2007 | Determinants of the diurnal course of salivary alpha-amylase                                                                                                         |
| USA       | 1/2 | 351       | 2009 | Determinants of salivary alpha-amylase in humans and methodological considerations                                                                                   |
| USA       | 1/2 | 349       | 2012 | Biodiversity and the Feel-Good Factor: Understanding Associations between Self-Reported Human Well-being and Species Richness                                        |
| USA       | 1/2 | 315       | 2017 | Nature Contact and Human Health: A Research Agenda                                                                                                                   |
| USA       | 1/2 | 296       | 2011 | A Difference-in-Differences Analysis of Health, Safety, and Greening Vacant Urban Space                                                                              |
| USA       | 1/2 | 295       | 2017 | Biodiversity in the city: key challenges for urban green space management                                                                                            |
| USA       | 1/2 | 285       | 2014 | Exposure to Neighborhood Green Space and Mental Health: Evidence from the Survey of the Health of Wisconsin                                                          |
| England   | 2/1 | 682       | 2012 | Contributions of cultural services to the ecosystem services agenda                                                                                                  |

|           |      |     |      |                                                                                                                                                                                     |
|-----------|------|-----|------|-------------------------------------------------------------------------------------------------------------------------------------------------------------------------------------|
| England   | 2/1  | 545 | 2011 | Does Participating in Physical Activity in Outdoor Natural Environments Have a Greater Effect on Physical and Mental Well-being than Physical Activity Indoors? A Systematic Review |
| England   | 2/1  | 515 | 2012 | More green space is linked to less stress in deprived communities: Evidence from salivary cortisol patterns                                                                         |
| England   | 2/1  | 442 | 2013 | What are the Benefits of Interacting with Nature?                                                                                                                                   |
| England   | 2/1  | 402 | 2016 | Has land use pushed terrestrial biodiversity beyond the planetary boundary? A global assessment                                                                                     |
| England   | 2/1  | 349 | 2012 | Biodiversity and the Feel-Good Factor: Understanding Associations between Self-Reported Human Well-being and Species Richness SO BIOSCIENCE                                         |
| England   | 2/1  | 337 | 2018 | The health benefits of the great outdoors: A systematic review and meta-analysis of greenspace exposure and health outcomes                                                         |
| England   | 2/1  | 295 | 2017 | Biodiversity in the city: key challenges for urban green space management                                                                                                           |
| England   | 2/1  | 257 | 2013 | Green Space and Stress: Evidence from Cortisol Measures in Deprived Urban Communities                                                                                               |
| England   | 2/1  | 233 | 2015 | Human-environment interactions in urban green spaces - A systematic review of contemporary issues and prospects for future research                                                 |
| Australia | 4/3  | 442 | 2013 | What are the Benefits of Interacting with Nature?                                                                                                                                   |
| Australia | 4/3  | 402 | 2016 | Has land use pushed terrestrial biodiversity beyond the planetary boundary? A global assessment                                                                                     |
| Australia | 4/3  | 389 | 2008 | Associations of neighbourhood greenness with physical and mental health: do walking, social coherence and local social interaction explain the relationships?                       |
| Australia | 4/3  | 170 | 2015 | The Health Benefits of Urban Nature: How Much Do We Need?                                                                                                                           |
| Australia | 4/3  | 147 | 2013 | Relationships between place attachment, place satisfaction and pro-environmental behaviour in an Australian national park                                                           |
| Australia | 4/3  | 147 | 2014 | Evaluating restoration in urban green spaces: Does setting type make a difference?                                                                                                  |
| Australia | 4/3  | 131 | 2015 | 40-second green roof views sustain attention: The role of micro-breaks in attention restoration                                                                                     |
| Australia | 4/3  | 128 | 2017 | Doses of Neighborhood Nature: The Benefits for Mental Health of Living with Nature                                                                                                  |
| Australia | 4/3  | 128 | 2009 | Associations Between Neighborhood Open Space Attributes and Quality of Life for Older People in Britain                                                                             |
| Australia | 4/3  | 102 | 2018 | Climate change and mental health: risks, impacts and priority actions                                                                                                               |
| China     | 2/30 | 233 | 2019 | Nature and mental health: An ecosystem service perspective                                                                                                                          |
| China     | 2/30 | 159 | 2014 | A dose of nature: Tree cover, stress reduction, and gender differences                                                                                                              |
| China     | 2/30 | 105 | 2018 | Effects of urban form on the urban heat island effect based on spatial regression model                                                                                             |

## Supplementary Material

|             |      |     |      |                                                                                                                                           |
|-------------|------|-----|------|-------------------------------------------------------------------------------------------------------------------------------------------|
| China       | 2/30 | 90  | 2012 | Therapeutic effect of forest bathing on human hypertension in the elderly                                                                 |
| China       | 2/30 | 82  | 2018 | Residential greenness and prevalence of major depressive disorders: a cross-sectional, observational, associational study of 94 879 adult |
| China       | 2/30 | 78  | 2019 | Impacts of urbanization-induced land-use changes on ecosystem services: A case study of the Pearl River Delta Metropolitan Region, China  |
| China       | 2/30 | 75  | 2019 | Exploring the disparities in park access through mobile phone data: Evidence from Shanghai, China                                         |
| China       | 2/30 | 69  | 2012 | Effects of Short-Term Forest Bathing on Human Health in a Broad-Leaved Evergreen Forest in Zhejiang Province, China                       |
| China       | 2/30 | 68  | 2015 | A dose-response curve describing the relationship between tree cover density and landscape preference                                     |
| China       | 2/30 | 67  | 2016 | A Dose-Response Curve Describing the Relationship Between Urban Tree Cover Density and Self-Reported Stress Recovery                      |
| Japan       | 5/20 | 386 | 2014 | The influence of urban green environments on stress relief measures: A field experiment                                                   |
| Japan       | 5/20 | 240 | 2011 | Effect of forest bathing on physiological and psychological responses in young Japanese male subjects                                     |
| Japan       | 5/20 | 188 | 2013 | Physiological and psychological effects of viewing urban forest landscapes assessed by multiple measurements                              |
| Japan       | 5/20 | 152 | 2008 | Visiting a forest, but not a city, increases human natural killer activity and expression of anti-cancer proteins                         |
| Japan       | 5/20 | 145 | 2009 | Restorative effects of viewing real forest landscapes, based on a comparison with urban landscapes                                        |
| Japan       | 5/20 | 131 | 2008 | A forest bathing trip increases human natural killer activity and expression of anti-cancer proteins in female subjects                   |
| Japan       | 5/20 | 124 | 2009 | Physiological Effects of Forest Recreation in a Young Conifer Forest in Hinokage Town                                                     |
| Japan       | 5/20 | 124 | 2011 | Relationship between psychological responses and physical environments in forest settings                                                 |
| Japan       | 5/20 | 119 | 2014 | Influence of Forest Therapy on Cardiovascular Relaxation in Young Adults                                                                  |
| Japan       | 5/20 | 112 | 2016 | Physiological Effects of Nature Therapy: A Review of the Research in Japan                                                                |
| South Korea | 6/21 | 240 | 2011 | Effect of forest bathing on physiological and psychological responses in young Japanese male subjects                                     |
| South Korea | 6/21 | 188 | 2013 | Physiological and psychological effects of viewing urban forest landscapes assessed by multiple measurements                              |
| South Korea | 6/21 | 124 | 2011 | Relationship between psychological responses and physical environments in forest settings                                                 |
| South Korea | 6/21 | 119 | 2014 | Influence of Forest Therapy on Cardiovascular Relaxation in Young Adults                                                                  |
| South Korea | 6/21 | 100 | 2014 | Emotional, Restorative and Vitalizing Effects of Forest and Urban Environments at Four Sites in Japan                                     |

|             |      |     |      |                                                                                                                                                                          |
|-------------|------|-----|------|--------------------------------------------------------------------------------------------------------------------------------------------------------------------------|
| South Korea | 6/21 | 81  | 2012 | The Effect of Cognitive Behavior Therapy-Based "Forest Therapy" Program on Blood Pressure, Salivary Cortisol Level, and Quality of Life in Elderly Hypertensive Patients |
| South Korea | 6/21 | 77  | 2013 | Physiological and psychological effects of walking on young males in urban parks in winter                                                                               |
| South Korea | 6/21 | 55  | 2017 | Effects of Forest Therapy on Depressive Symptoms among Adults: A Systematic Review                                                                                       |
| South Korea | 6/21 | "53 | 2017 | Health and well-being benefits of spending time in forests: systematic review                                                                                            |
| South Korea | 6/21 | 55  | 2014 | Browning control of fresh-cut lettuce by phytoncide treatment                                                                                                            |

**Note:** USA: the United States of America; N/C: Rank of the number of publications/ Rank of the centralities
